# Supplementary material for: Co-Administration of High-Dose Nebulized Colistin for Acinetobacter baumannii Bacteremic Ventilator-Associated Pneumonia: Impact on Outcomes
Source: MDPI journal article supplement (doi:10.3390/antibiotics13020169), 2024-02-08
Supplement: s1 [file s1]

Supplemental Table S1. Propensity score- adjusted analysis on *A. baumannii* attributed mortality

| parameter                            | Odds ratio | 95% CI (lower – upper limit) | p- value |
|--------------------------------------|------------|------------------------------|----------|
| Propensity score                     | 8.148      | 0.060- 1109                  | 0.403    |
| Ampicillin /sulbactam administration | 0.976      | 0.291 – 3.273                | 0.976    |
| Nebulized colistin administration    | 0.228      | 0.062 – 0.840                | 0.026    |
| Pan- drug Resistant (PDR) strain     | 1.075      | 0.159 – 7.262                | 0.941    |
